# Supplementary material for: Coordination chemistry of hepta-tert-butylnonaphosphane
Source: Royal Society of Chemistry journal article supplement (doi:10.1039/d2dt01691e), 2022-01-01
Supplement: d2dt01691e2.pdf [file d2dt01691e2.pdf]

# Electronic Supporting Information

*Coordination Chemistry of Hepta-tert-butylnonaphosphane*

Volker Eilrich, Toni Grell, Peter Lönnecke and Evamarie Hey-Hawkins

## Content

|      |                                                                                                                                                                                                        |    |
|------|--------------------------------------------------------------------------------------------------------------------------------------------------------------------------------------------------------|----|
| 1.   | DFT Calculations.....                                                                                                                                                                                  | 1  |
| 2.   | TG-DTA Analysis.....                                                                                                                                                                                   | 4  |
| 2.1. | [Fe(CO) <sub>4</sub> (cyclo-(P <sup>t</sup> Bu) <sub>3</sub> ) <sub>2</sub> P <sup>t</sup> Bu-κP <sup>9</sup> ] (1).....                                                                               | 4  |
| 2.2. | [Co(CO) <sub>2</sub> (NO)(cyclo-(P <sup>t</sup> Bu) <sub>3</sub> ) <sub>2</sub> P <sup>t</sup> Bu-κP <sup>9</sup> ] (2).....                                                                           | 4  |
| 2.3. | [(CuBr) <sub>2</sub> (cyclo-(P <sup>t</sup> Bu) <sub>3</sub> ) <sub>2</sub> P <sup>t</sup> Bu-κ <sup>2</sup> P <sup>2</sup> ,P <sup>7</sup> ,κ <sup>2</sup> P <sup>3</sup> ,P <sup>6</sup> }] (3)..... | 5  |
| 2.4. | [RhCl(CO)(cyclo-(P <sup>t</sup> Bu) <sub>3</sub> ) <sub>2</sub> P <sup>t</sup> Bu-κ <sup>2</sup> P <sup>6</sup> ,P <sup>9</sup> ] (4).....                                                             | 5  |
| 3.   | Single Crystal X-Ray Diffraction.....                                                                                                                                                                  | 6  |
| 4.   | NMR Spectra.....                                                                                                                                                                                       | 7  |
| 4.1. | [Fe(CO) <sub>4</sub> (cyclo-(P <sup>t</sup> Bu) <sub>3</sub> ) <sub>2</sub> P <sup>t</sup> Bu-κP <sup>9</sup> ] (1).....                                                                               | 7  |
| 4.2. | [Co(CO) <sub>2</sub> (NO)(cyclo-(P <sup>t</sup> Bu) <sub>3</sub> ) <sub>2</sub> P <sup>t</sup> Bu-κP <sup>9</sup> ] (2).....                                                                           | 9  |
| 4.3. | [(CuBr) <sub>2</sub> (cyclo-(P <sup>t</sup> Bu) <sub>3</sub> ) <sub>2</sub> P <sup>t</sup> Bu-κ <sup>2</sup> P <sup>2</sup> ,P <sup>7</sup> ,κ <sup>2</sup> P <sup>3</sup> ,P <sup>6</sup> }] (3)..... | 11 |
| 4.4. | [RhCl(CO)(cyclo-(P <sup>t</sup> Bu) <sub>3</sub> ) <sub>2</sub> P <sup>t</sup> Bu-κ <sup>2</sup> P <sup>6</sup> ,P <sup>9</sup> ] (4).....                                                             | 14 |

## 1. DFT Calculations

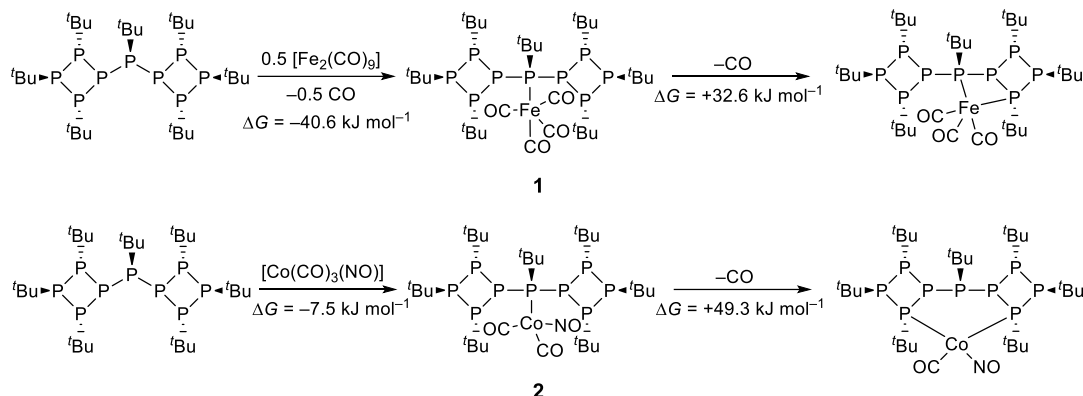

**Scheme S1** Calculated energies for the formation of the hypothetical bidentate iron and cobalt complexes formed from complexes **1** and **2**. The energy of the most stable configuration of the respective hypothetical complexes with bidentate bonding mode was used (see below, Scheme S4).

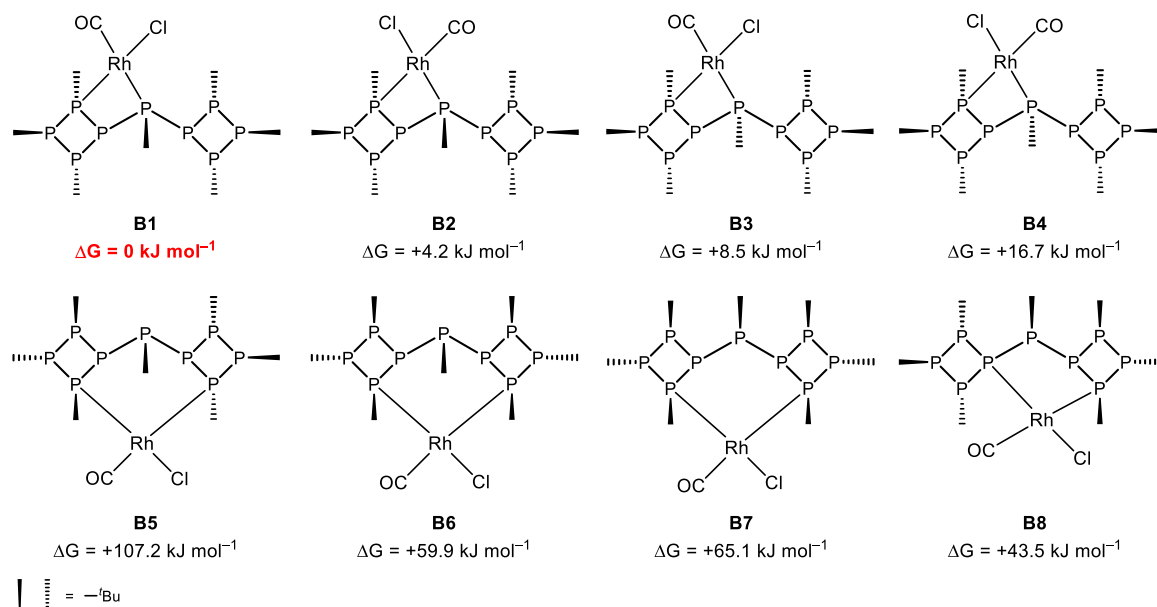

**Scheme S2** Structural formulas and relative energies of all possible configurational isomers of the bidentate rhodium complex **4**. Configurations according to the different bidentate bonding modes are labelled **B1–B8**. Minimum energies are labelled in red.

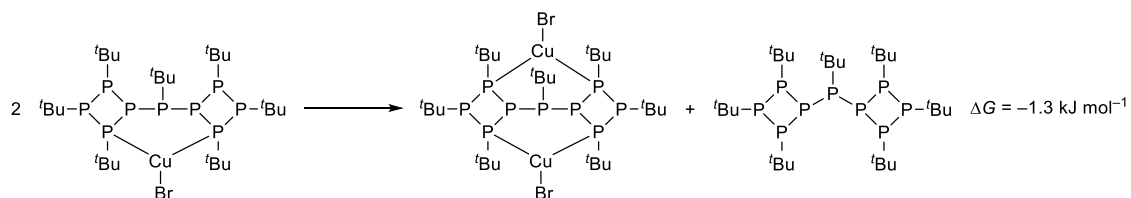

**Scheme S3** Two molecules of the mononuclear copper(I) complex react to give one molecule of **3** and one molecule of the ligand **L**. To find the most stable configuration of the mononuclear bidentate complex, the different configurations analogous to Scheme S2 were calculated. The most stable configuration corresponds to **B7**, which was used to calculate this reaction energy.

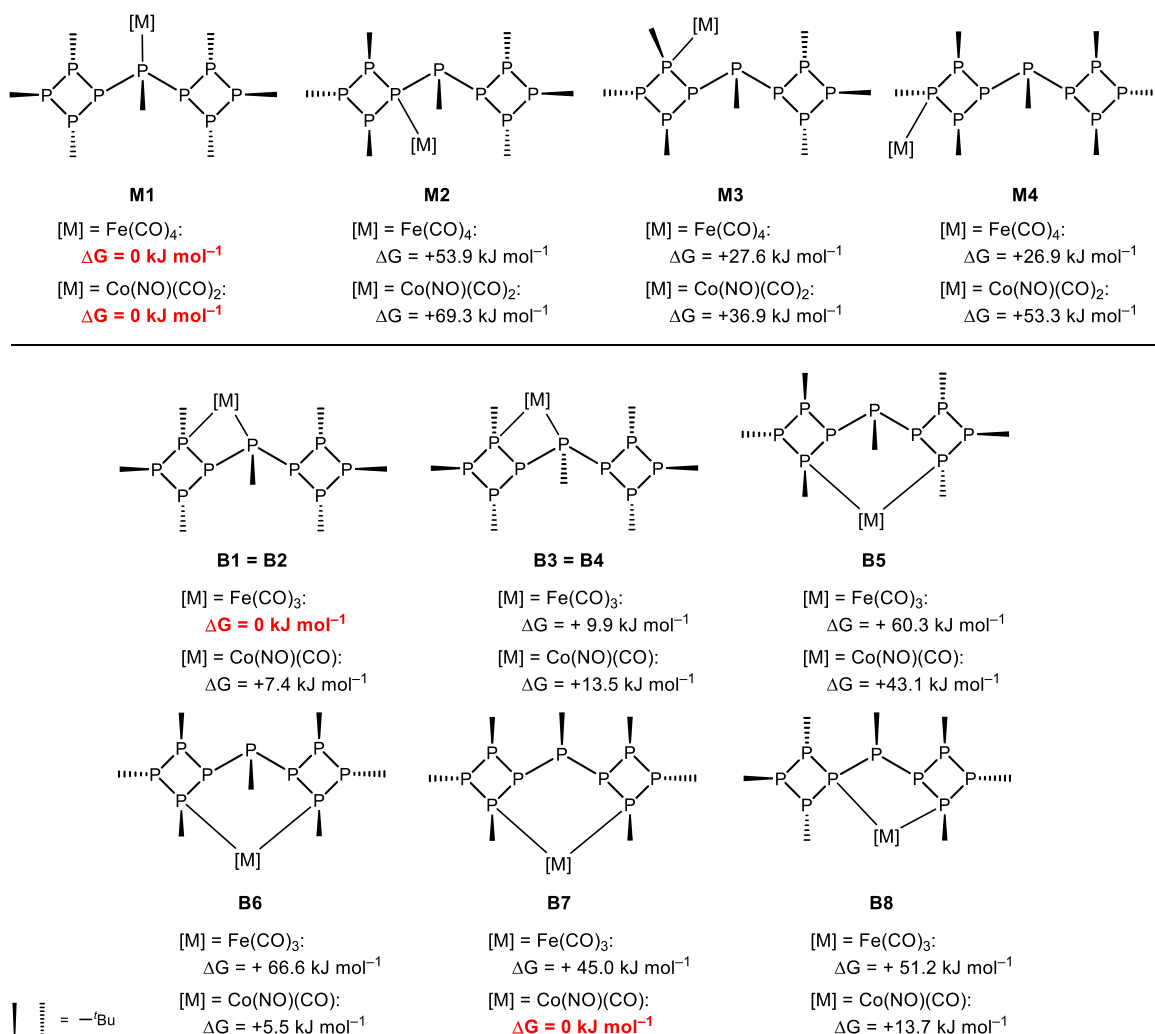

**Scheme S4** Structural formulas and relative energies of all possible constitutional isomers of the monodentate iron and cobalt complexes **1** and **2** (top) as well as the configurational isomers of their hypothetical bidentate complexes (bottom). Minimum energies are labelled in red. Constitutions according to monodentate bonding modes are labelled **M1–M4**. Configurations of the bidentate bonding modes are labelled **B1–B8**, in analogy to the ones calculated for the rhodium complex **4**. It should be noted, that due to the different coordination environment in case of iron and cobalt, the configurations **B1** and **B2** as well as **B3** and **B4** are identical (different input structures yielded the same result).

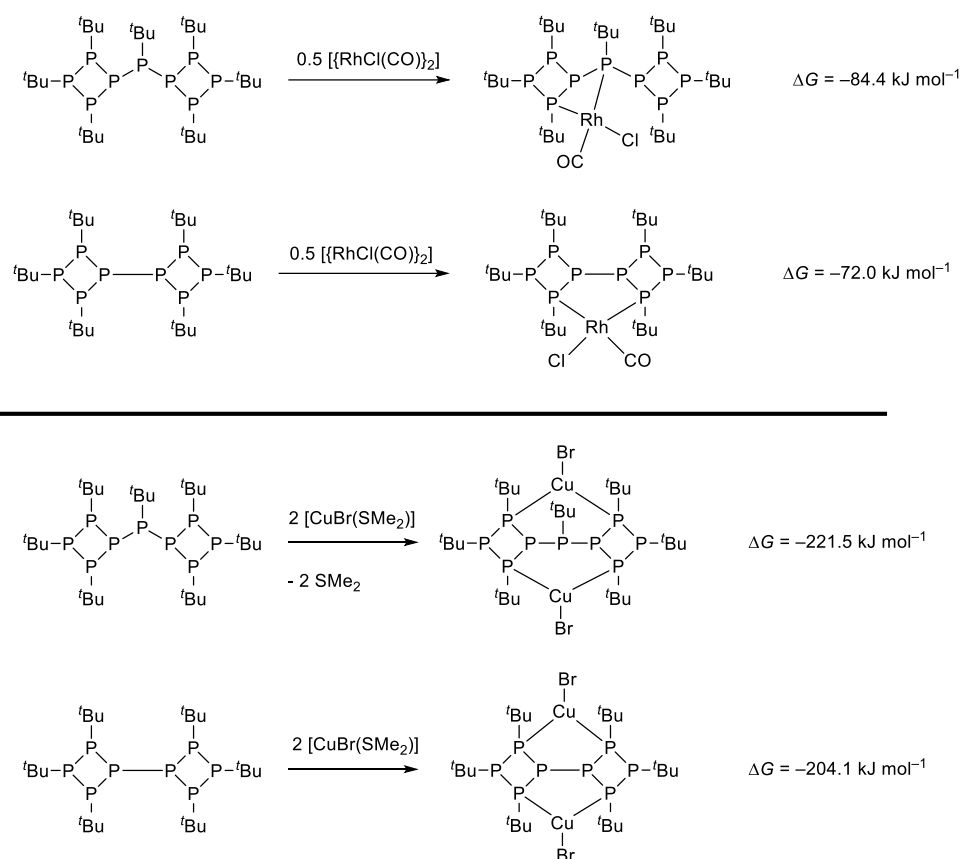

**Scheme S5** Calculated energies for the formation of complex **3** and **4** and their analogues with  $\{cyclo-(P_4^tBu_3)\}_2$ . For the latter two, the energies were already determined before<sup>1</sup> but were recalculated with the optimised benchmarked combination (Table S1) to allow an accurate comparison. The most stable configuration **B1** was used for complex **3**.

**Table S1** Results from the benchmarking to find the best functional and basis set combination based on the CO stretching vibration of complex **4**.

| Method                 | CO stretching vibration (cm <sup>-1</sup> ) |
|------------------------|---------------------------------------------|
| Experiment             | 1996.5                                      |
| BP86/def2-SVP          | 1967.6                                      |
| B3LYP/def2-TZVP        | 2028.7                                      |
| M06L/def2-TZVP         | 1977.4                                      |
| TPPS/def2-TZVP         | 1955.5                                      |
| <b>TPPSh/def2-TZVP</b> | <b>2004.0</b>                               |
| PBE0/def2-TZVP         | 2065.8                                      |

<sup>1</sup> T. Grell and E. Hey-Hawkins, *Inorg. Chem.*, 2020, **59**, 7487.

## 2. TG-DTA Analysis

### 2.1. $[\text{Fe}(\text{CO})_4(\{\text{cyclo}-(\text{P}_4^t\text{Bu}_3)_2\text{P}^i\text{Bu}-\kappa\text{P}^o\})] (1)$

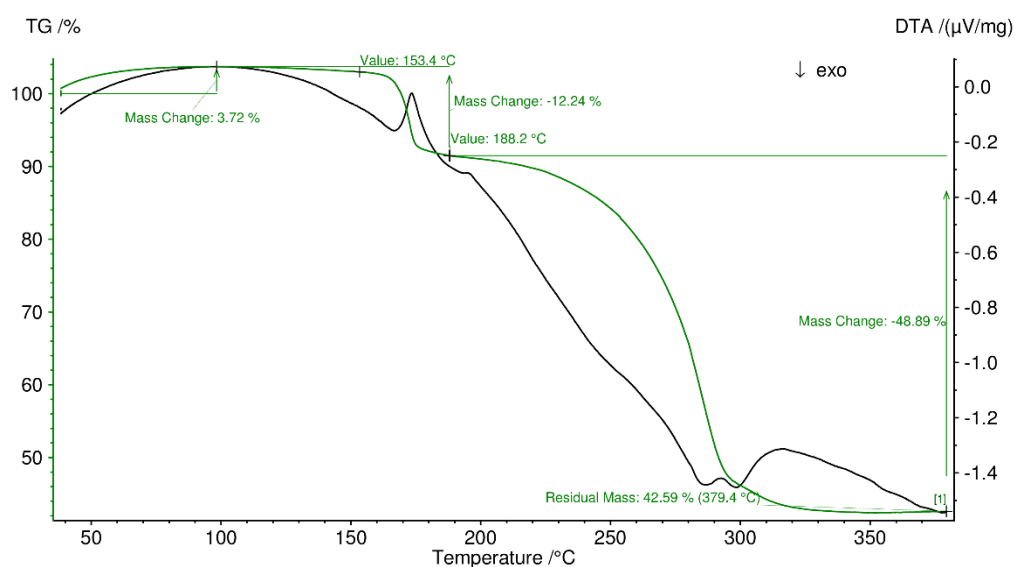

Fig. S1 TG-DTA of 1.

### 2.2. $[\text{Co}(\text{CO})_2(\text{NO})(\{\text{cyclo}-(\text{P}_4^t\text{Bu}_3)_2\text{P}^i\text{Bu}-\kappa\text{P}^o\})] (2)$

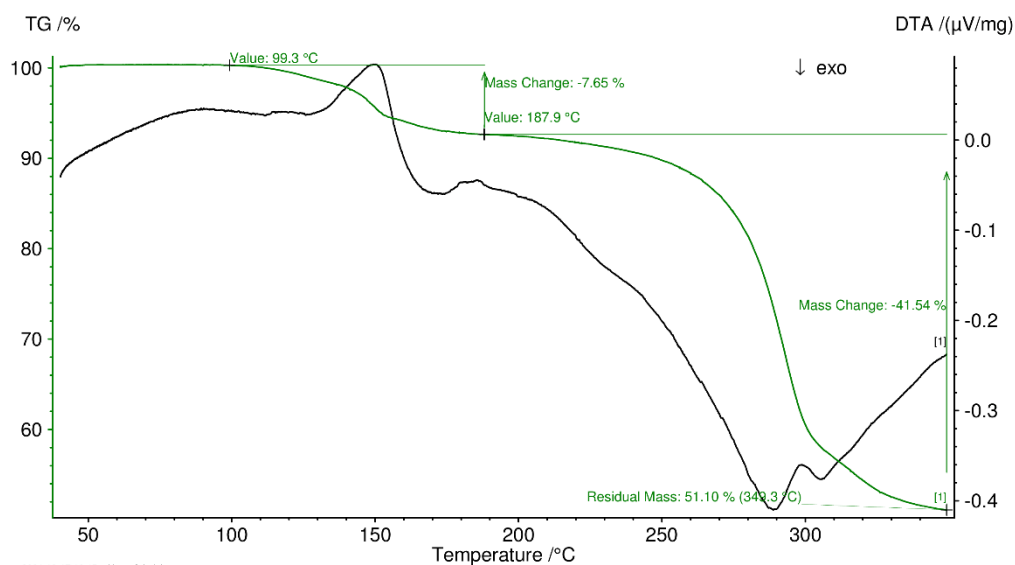

Fig. S2 TG-DTA of 2.

**2.3. [(CuBr)<sub>2</sub>(cyclo-(P<sub>4</sub><sup>t</sup>Bu<sub>3</sub>)<sub>2</sub>P<sup>t</sup>Bu-κ<sup>2</sup>P<sup>2</sup>,P<sup>7</sup>,κ<sup>2</sup>P<sup>3</sup>,P<sup>6</sup>)] (3)**

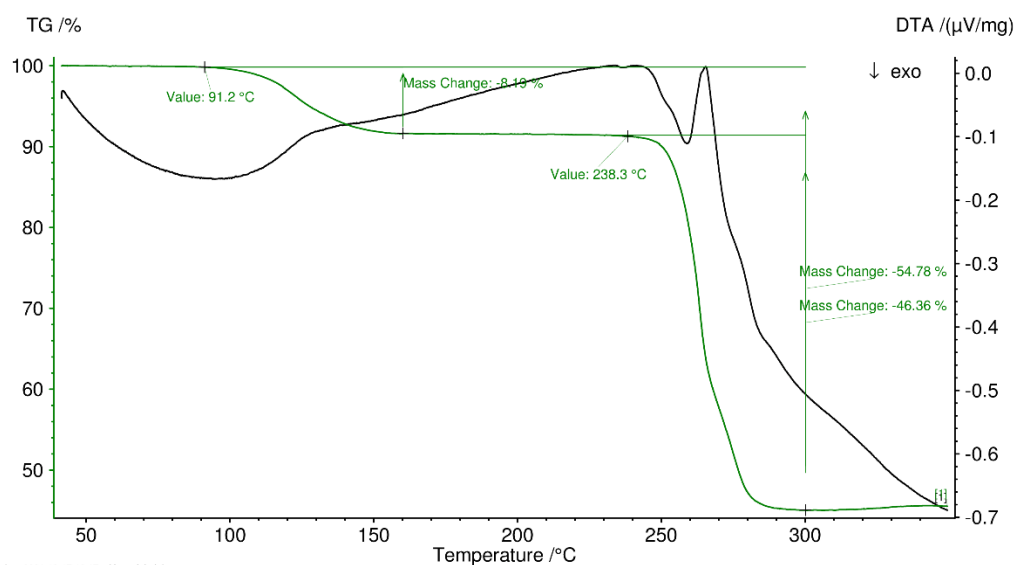

**Fig. S3** TG-DTA of **3**.

**2.4. [RhCl(CO)(cyclo-(P<sub>4</sub><sup>t</sup>Bu<sub>3</sub>)<sub>2</sub>P<sup>t</sup>Bu-κ<sup>2</sup>P<sup>6</sup>,P<sup>9</sup>)] (4)**

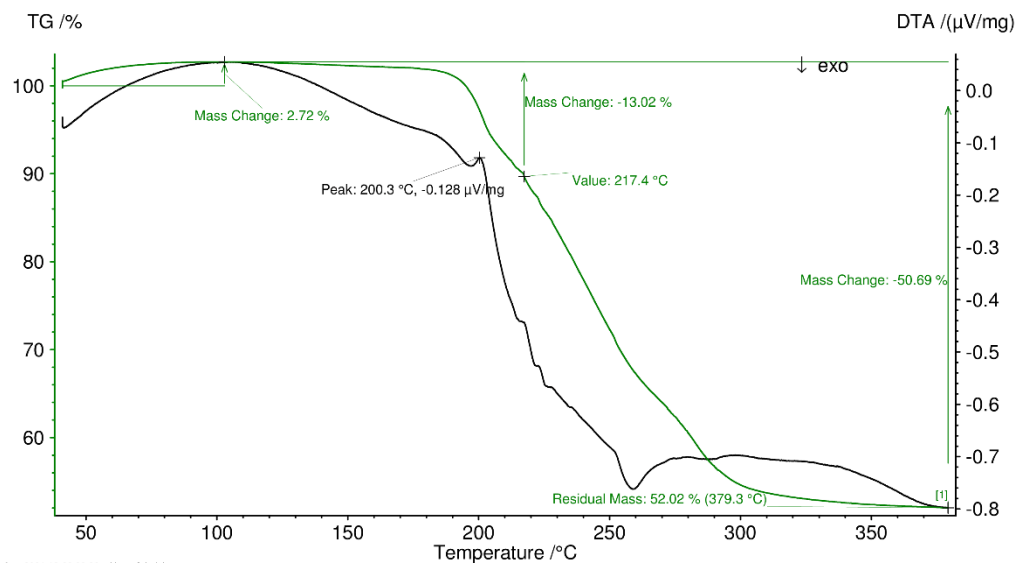

**Fig. S4** TG-DTA of **4**.

### 3. Single Crystal X-Ray Diffraction

**Table S2** Summary of Crystallographic Data Obtained from Single-Crystal X-Ray Diffraction.

| Compound                                                                             | 1                                                                 | 2                                                                 | 3 · C <sub>4</sub> H <sub>8</sub> O                                             | 4                                                                 | 5                                                                 |
|--------------------------------------------------------------------------------------|-------------------------------------------------------------------|-------------------------------------------------------------------|---------------------------------------------------------------------------------|-------------------------------------------------------------------|-------------------------------------------------------------------|
| Empirical formula                                                                    | C <sub>32</sub> H <sub>63</sub> FeO <sub>4</sub> P <sub>9</sub>   | C <sub>30</sub> H <sub>63</sub> CoNO <sub>3</sub> P <sub>9</sub>  | C <sub>32</sub> H <sub>71</sub> Br <sub>2</sub> Cu <sub>2</sub> OP <sub>9</sub> | C <sub>29</sub> H <sub>63</sub> ClOP <sub>9</sub> Rh              | C <sub>28</sub> H <sub>63</sub> Cl <sub>2</sub> P <sub>9</sub> Pd |
| Formula weight                                                                       | 846.40                                                            | 823.47                                                            | 1037.51                                                                         | 844.48                                                            | 855.81                                                            |
| Temperature [K]                                                                      | 130(2)                                                            | 130(2)                                                            | 130(2)                                                                          | 130(2)                                                            | 130(2)                                                            |
| Wavelength [pm]                                                                      | 71.073                                                            | 71.073                                                            | 71.073                                                                          | 71.073                                                            | 71.073                                                            |
| Crystal system                                                                       | Monoclinic                                                        | Triclinic                                                         | Monoclinic                                                                      | Monoclinic                                                        | Monoclinic                                                        |
| Space group                                                                          | <i>I</i> 2/ <i>a</i>                                              | <i>P</i> $\bar{1}$                                                | <i>P</i> 2 <sub>1</sub> / <i>c</i>                                              | <i>P</i> 2 <sub>1</sub> / <i>c</i>                                | <i>P</i> 2 <sub>1</sub> / <i>c</i>                                |
| Unit cell                                                                            |                                                                   |                                                                   |                                                                                 |                                                                   |                                                                   |
| <i>a</i> [pm]                                                                        | 1846.95(3)                                                        | 1123.70(3)                                                        | 1154.77(1)                                                                      | 2376.32(3)                                                        | 2398.98(8)                                                        |
| <i>b</i> [pm]                                                                        | 1030.08(1)                                                        | 1992.94(5)                                                        | 1955.29(3)                                                                      | 922.05(1)                                                         | 904.93(3)                                                         |
| <i>c</i> [pm]                                                                        | 2385.12(4)                                                        | 2199.07(5)                                                        | 2087.09(3)                                                                      | 1952.00(3)                                                        | 1954.63(8)                                                        |
| $\alpha$ [deg]                                                                       | 90                                                                | 110.379(2)                                                        | 90                                                                              | 90                                                                | 90                                                                |
| $\beta$ [deg]                                                                        | 103.481(2)                                                        | 96.610(2)                                                         | 99.633(1)                                                                       | 99.045(1)                                                         | 99.562(3)                                                         |
| $\gamma$ [deg]                                                                       | 90                                                                | 105.435(2)                                                        | 90                                                                              | 90                                                                | 90                                                                |
| Volume [nm <sup>3</sup> ]                                                            | 4.4127(1)                                                         | 4.3307(2)                                                         | 4.6460(1)                                                                       | 4.2279(1)                                                         | 4.1844(3)                                                         |
| <i>Z</i>                                                                             | 4                                                                 | 4                                                                 | 4                                                                               | 4                                                                 | 4                                                                 |
| $\rho$ (calc) [Mg/m <sup>3</sup> ]                                                   | 1.274                                                             | 1.263                                                             | 1.483                                                                           | 1.327                                                             | 1.358                                                             |
| $\mu$ mm <sup>-1</sup>                                                               | 0.700                                                             | 0.758                                                             | 2.970                                                                           | 0.829                                                             | 0.934                                                             |
| <i>F</i> (000)                                                                       | 1792                                                              | 1744                                                              | 2136                                                                            | 1768                                                              | 1784                                                              |
| Crystal size [mm <sup>3</sup> ]                                                      | 0.40 × 0.30 × 0.20                                                | 0.20 × 0.20 × 0.07                                                | 0.40 × 0.40 × 0.30                                                              | 0.30 × 0.20 × 0.03                                                | 0.15 × 0.08 × 0.02                                                |
| $\Theta$ min / $\Theta$ max [deg]                                                    | 1.756 / 34.683                                                    | 1.814 / 29.047                                                    | 1.789 / 34.754                                                                  | 2.113 / 32.374                                                    | 1.722 / 28.527                                                    |
| Index ranges                                                                         | -29 ≤ <i>h</i> ≤ 27<br>-16 ≤ <i>k</i> ≤ 16<br>-37 ≤ <i>l</i> ≤ 37 | -14 ≤ <i>h</i> ≤ 14<br>-26 ≤ <i>k</i> ≤ 27<br>-29 ≤ <i>l</i> ≤ 28 | -18 ≤ <i>h</i> ≤ 17<br>-31 ≤ <i>k</i> ≤ 31<br>-33 ≤ <i>l</i> ≤ 32               | -35 ≤ <i>h</i> ≤ 35<br>-13 ≤ <i>k</i> ≤ 13<br>-28 ≤ <i>l</i> ≤ 28 | -28 ≤ <i>h</i> ≤ 31<br>-11 ≤ <i>k</i> ≤ 12<br>-25 ≤ <i>l</i> ≤ 25 |
| Reflections collected                                                                | 42537                                                             | 57339                                                             | 112352                                                                          | 103742                                                            | 31603                                                             |
| Independent reflections [R(int)]                                                     | 9070 [0.0312]                                                     | 20272 [0.0562]                                                    | 19149 [0.0440]                                                                  | 14390 [0.0629]                                                    | 9657 [0.0987]                                                     |
| Completeness [%] ( $\Theta$ ) [deg]                                                  | 100 (33.140)                                                      | 100 (26.375)                                                      | 100 (33.140)                                                                    | 100 (30.510)                                                      | 100 (26.375)                                                      |
| <i>T</i> <sub>Max</sub> / <i>T</i> <sub>Min</sub>                                    | 1.00000 / 0.84931                                                 | 1.00000 / 0.92285                                                 | 1.00000 / 0.67185                                                               | 1.00000 / 0.92353                                                 | 1.00000 / 0.68164                                                 |
| Restraints / parameters                                                              | 10 / 256                                                          | 0 / 835                                                           | 51 / 469                                                                        | 0 / 391                                                           | 0 / 382                                                           |
| Goodness-of-fit on <i>F</i> <sup>2</sup>                                             | 1.231                                                             | 1.019                                                             | 1.057                                                                           | 1.050                                                             | 0.995                                                             |
| <i>R</i> <sub>1</sub> , <i>wR</i> <sub>2</sub> [ <i>I</i> > 2 $\sigma$ ( <i>I</i> )] | 0.0666, 0.1484                                                    | 0.0534, 0.1213                                                    | 0.0365, 0.0791                                                                  | 0.0411, 0.0777                                                    | 0.0511, 0.0867                                                    |
| <i>R</i> indices (all data)                                                          | 0.0769, 0.1523                                                    | 0.0994, 0.1442                                                    | 0.0676, 0.0942                                                                  | 0.0577, 0.0831                                                    | 0.1064, 0.1070                                                    |
| Residual electron density [e · Å <sup>-3</sup> ]                                     | 0.619 / -0.536                                                    | 1.115 / -0.862                                                    | 0.985 / -0.740                                                                  | 1.141 / -0.520                                                    | 0.812 / -1.188                                                    |
| CCDC number                                                                          | 2144600                                                           | 2144601                                                           | 2144602                                                                         | 2144603                                                           | 2144604                                                           |

## 4. NMR Spectra

### 4.1. $[\text{Fe}(\text{CO})_4(\text{cyclo}-(\text{P}^t\text{Bu}_3)_2\text{P}^i\text{Bu}-\kappa\text{P}^o)]$ (**1**)

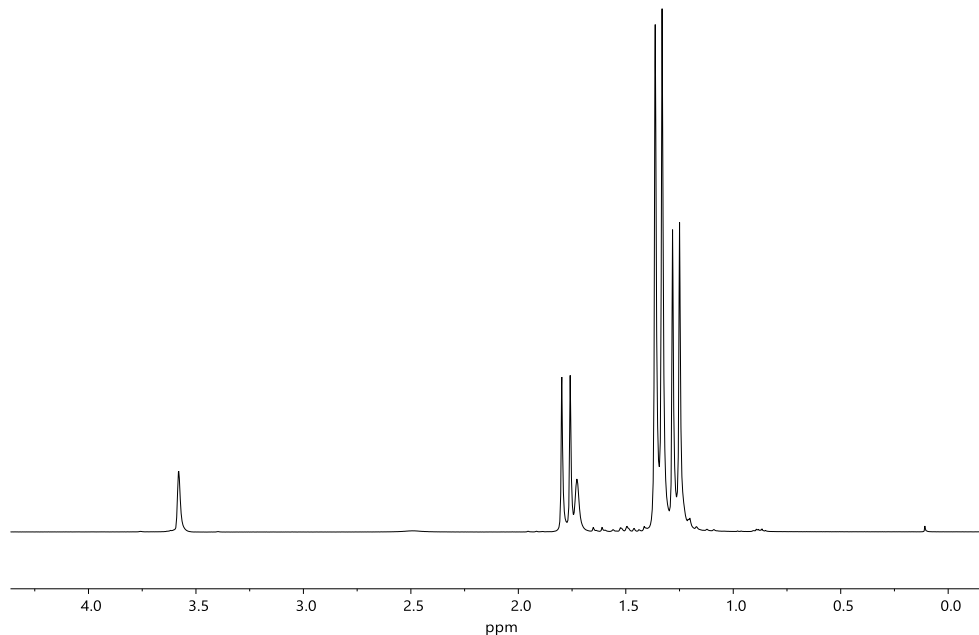

Fig. S5  $^1\text{H}$  NMR spectrum of **1** in  $\text{THF}-d^8$  (400 MHz).

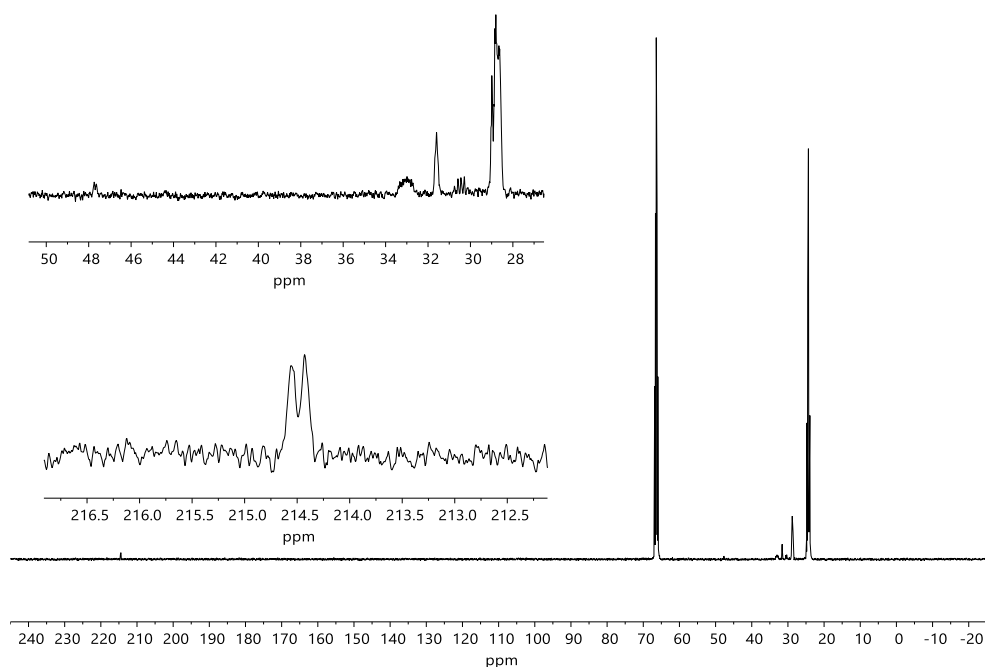

Fig. S6  $^{13}\text{C}\{^1\text{H}\}$  NMR spectrum of **1** in  $\text{THF}-d^8$  (101 MHz).



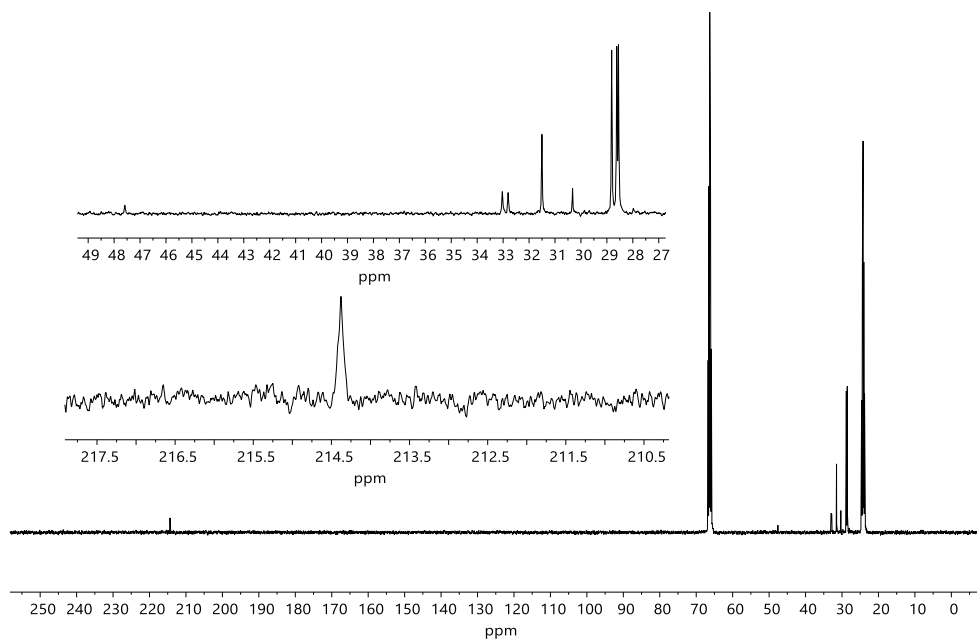

**Fig. S7**  $^{13}\text{C}\{^1\text{H},^{31}\text{P}\}$  NMR spectrum of **1** in  $\text{THF-}d^8$  (101 MHz) at  $28^\circ\text{C}$ .

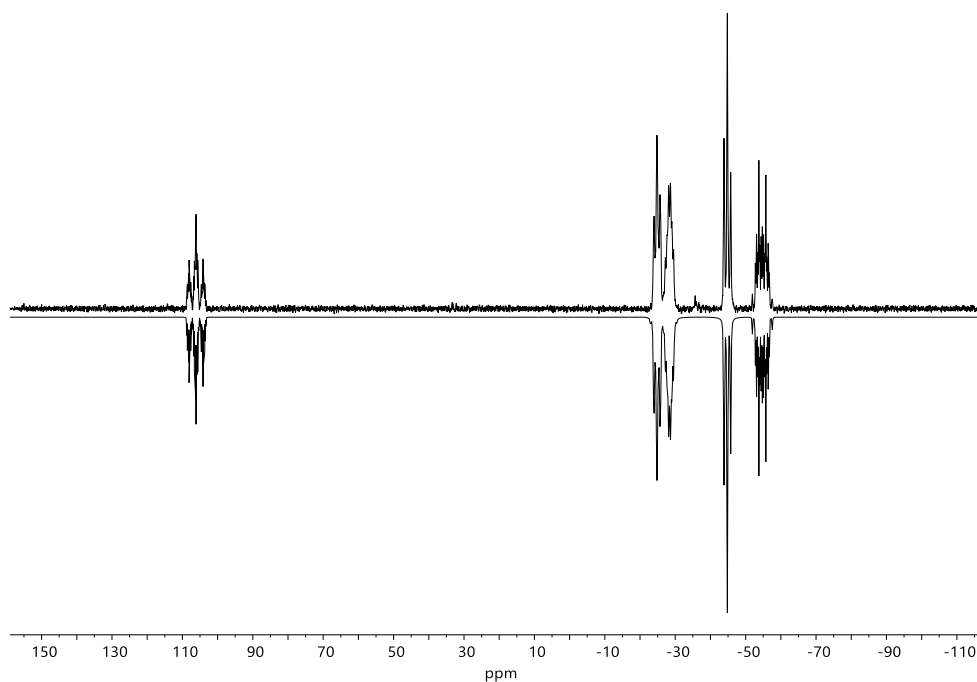

**Fig. S8** Experimental (top) and simulated (bottom)  $^{31}\text{P}\{^1\text{H}\}$  NMR spectrum of **1** in  $\text{THF-}d^8$  (162 MHz).

4.2.  $[\text{Co}(\text{CO})_2(\text{NO})(\{\text{cyclo}-(\text{P}_4^t\text{Bu}_3)\}_2\text{P}^t\text{Bu}-\kappa\text{P}^9)]$  (**2**)

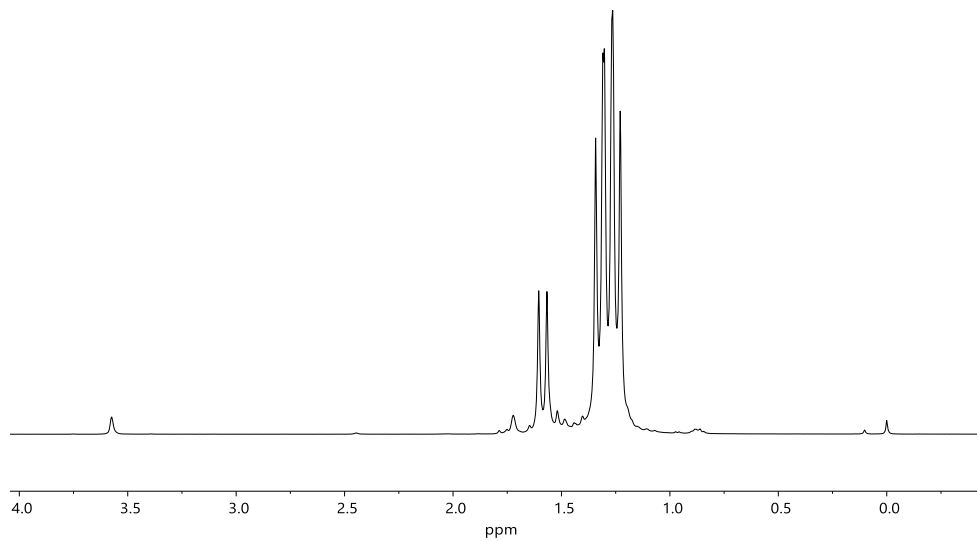

**Fig. S9**  $^1\text{H}$  NMR spectrum of **2** in  $\text{THF}-d^8$  (400 MHz).

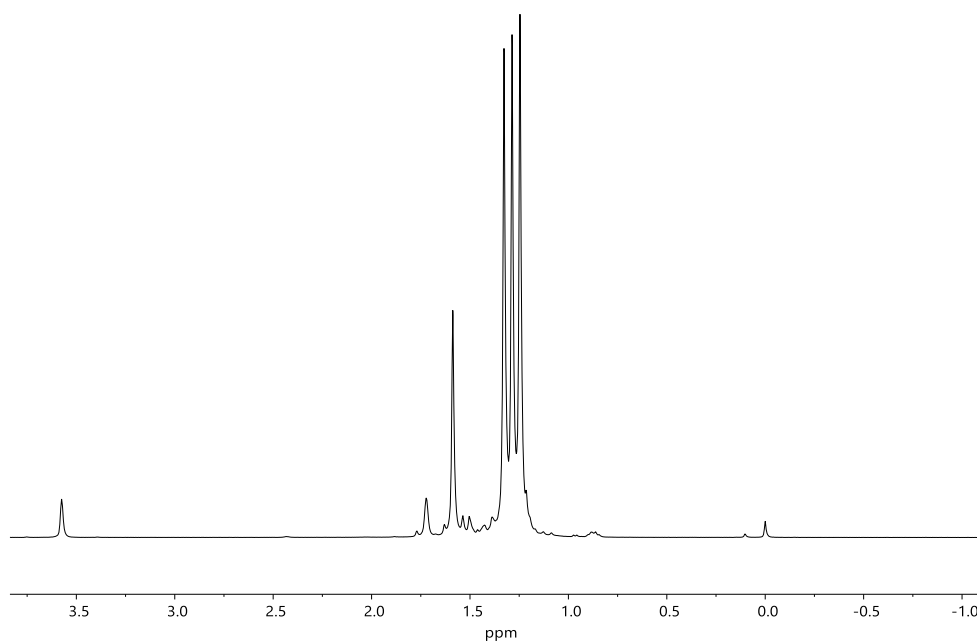

**Fig. S10**  $^1\text{H}\{^{31}\text{P}\}$  NMR spectrum of **2** in  $\text{THF}-d^8$  (400 MHz).

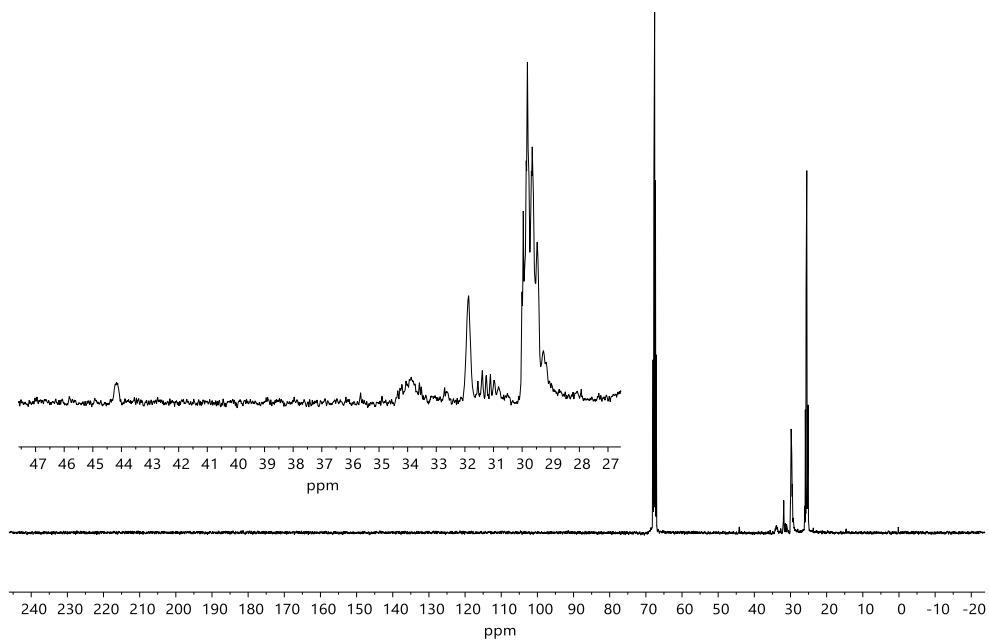

**Fig. S11**  $^{13}\text{C}\{^1\text{H}\}$  NMR spectrum of **2** in  $\text{THF-}d^8$  (101 MHz).

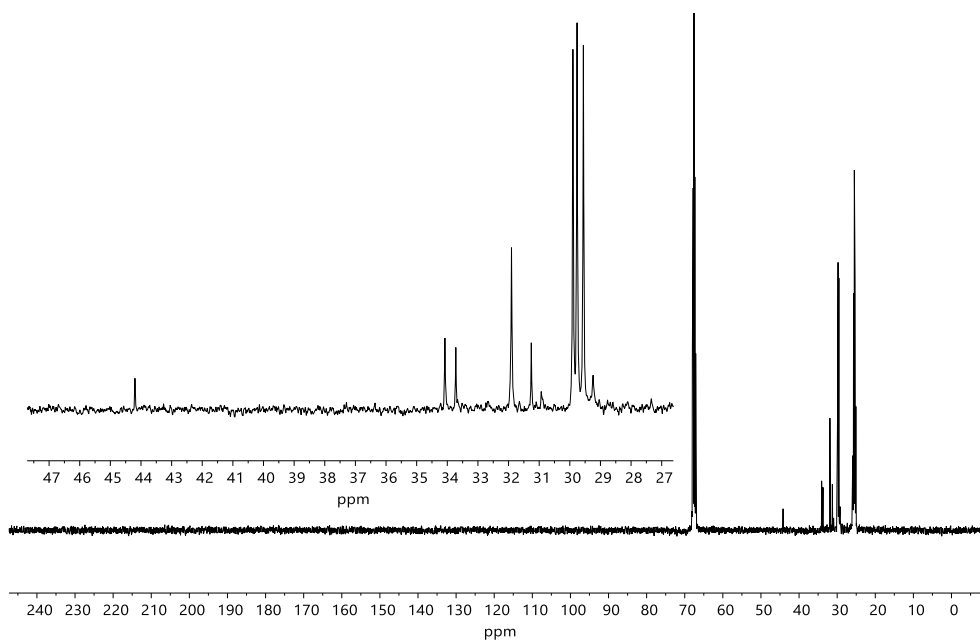

**Fig. S12**  $^{13}\text{C}\{^1\text{H},^{31}\text{P}\}$  NMR spectrum of **2** in  $\text{THF-}d^8$  (101 MHz) at 28 °C.

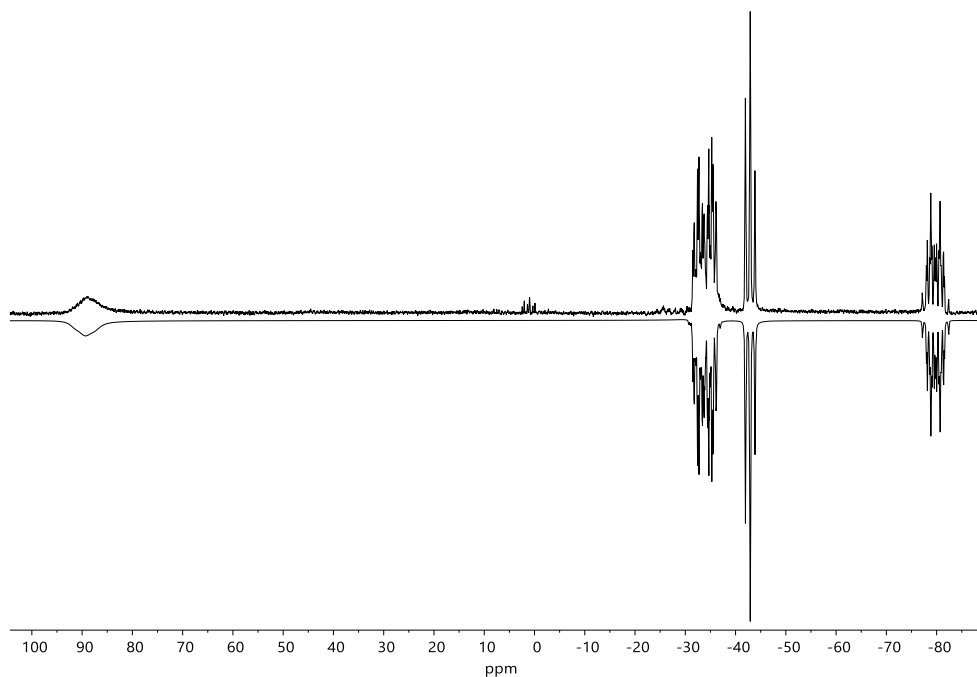

**Fig. S13** Experimental (top) and simulated (bottom)  $^{31}\text{P}\{^1\text{H}\}$  NMR spectrum of **2** in  $\text{THF-}d^8$  (162 MHz).

#### 4.3. $[(\text{CuBr})_2(\text{cyclo-}(\text{P}_4^t\text{Bu}_3)_2\text{P}^t\text{Bu-}\kappa^2\text{P}^2,\text{P}^7,\kappa^2\text{P}^3,\text{P}^6)]$ (**3**)

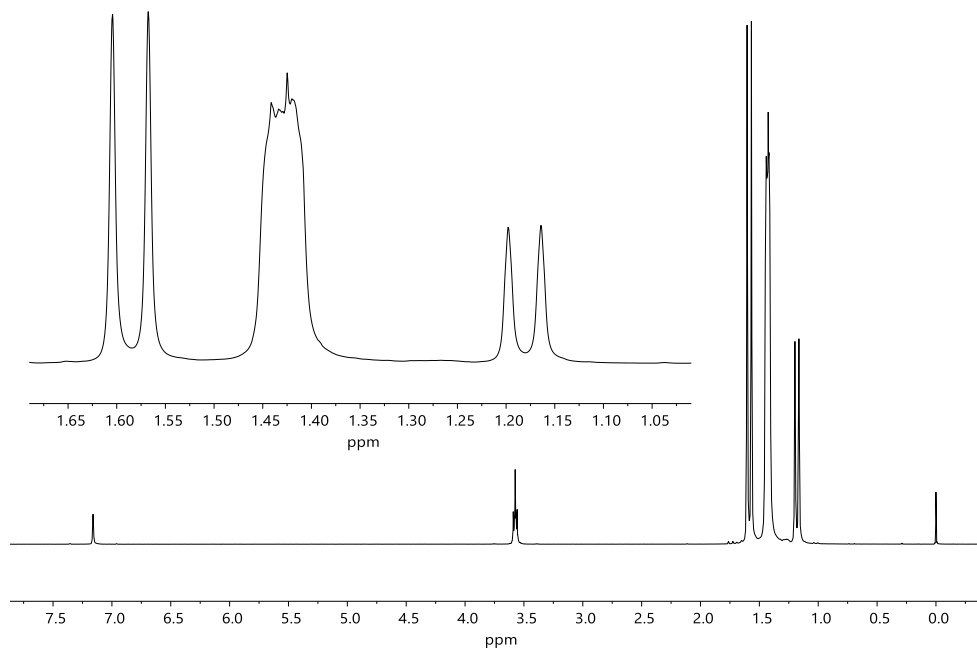

**Fig. S14**  $^1\text{H}$  NMR spectrum of **3** in  $\text{benzene-}d^6$  (400 MHz).

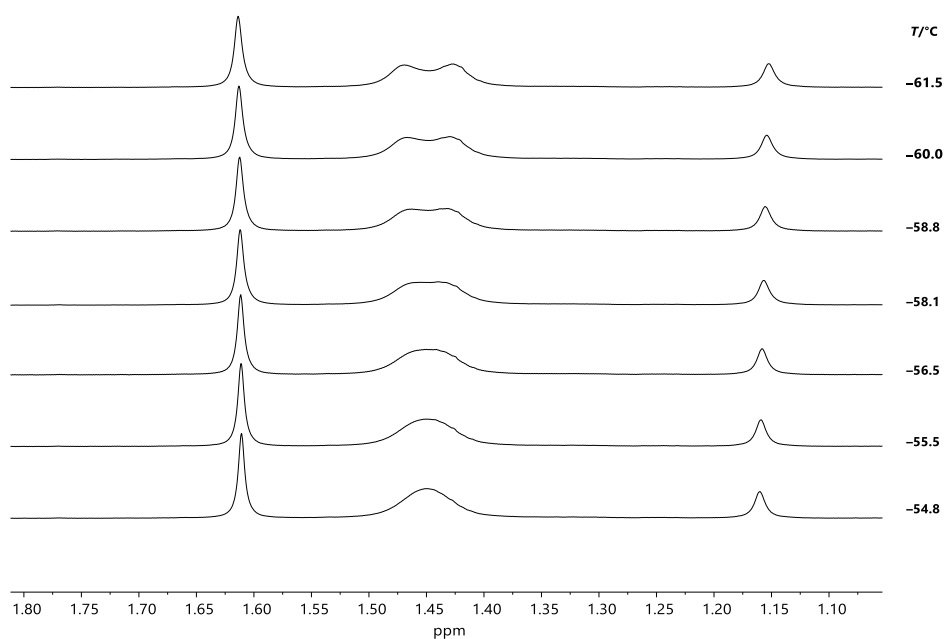

**Fig. S15** Excerpt of the  $^1\text{H}\{^{31}\text{P}\}$  VT NMR spectra of **3** in  $\text{toluene-}d^6$ , conducted with methanol (capillary) as internal standard for the temperature calibration.  $\Delta\nu_{\text{AB}}$  of the resonances at 1.45 ppm is found to be 20.5 Hz at  $-66.8^\circ\text{C}$ .

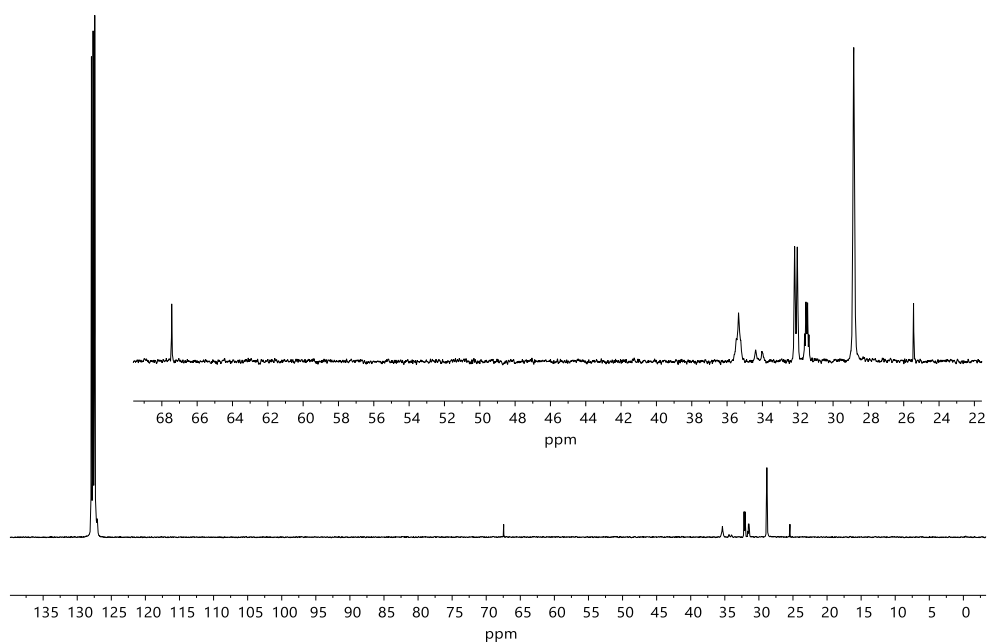

**Fig. S16**  $^{13}\text{C}\{^1\text{H}\}$  NMR spectrum of **3** in  $\text{benzene-}d^6$  (101 MHz).

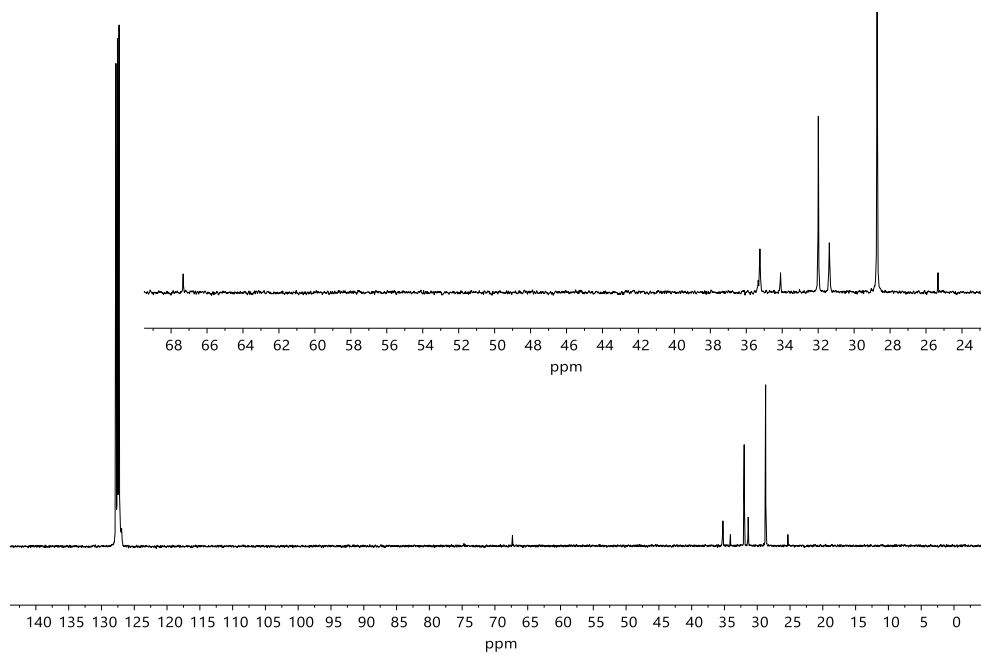

**Fig. S17**  $^{13}\text{C}\{^1\text{H},^{31}\text{P}\}$  NMR spectrum of **3** in benzene- $d^6$  (101 MHz) at 28 °C.

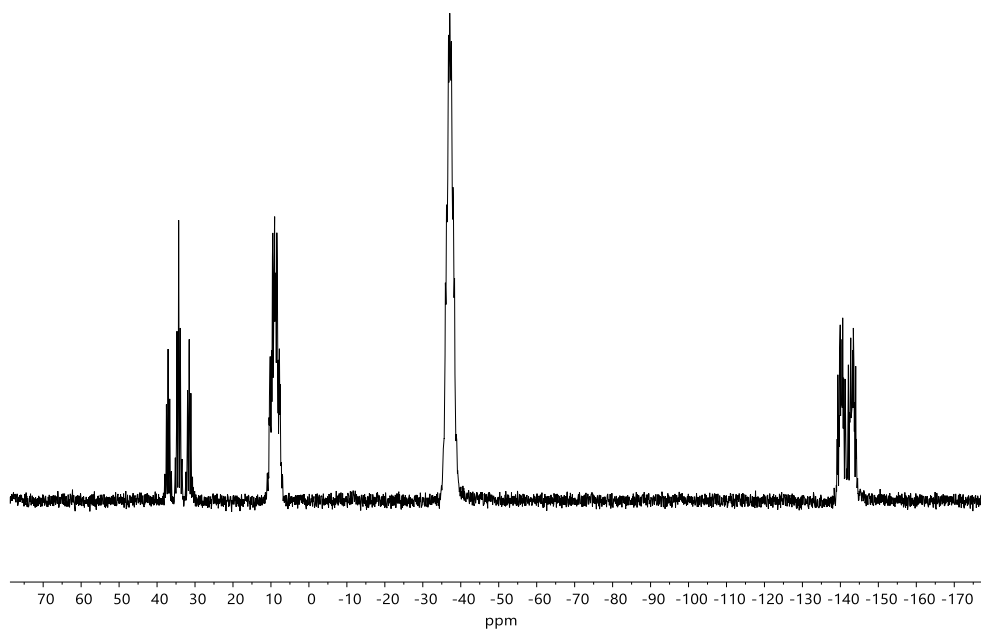

**Fig. S18**  $^{31}\text{P}\{^1\text{H}\}$  NMR spectrum of **3** in benzene- $d^6$  (162 MHz).

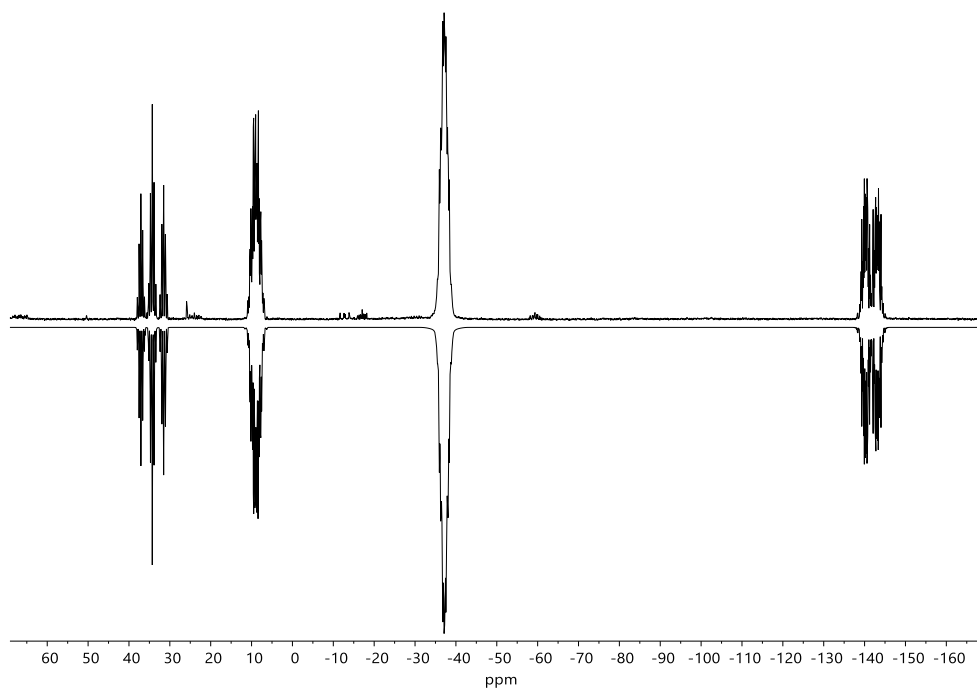

**Fig. S19** Experimental (top) and simulated (bottom)  $^{31}\text{P}\{^1\text{H}\}$  NMR spectrum of **3** in benzene- $d^6$  (162 MHz).

#### 4.4. $[\text{RhCl}(\text{CO})\{\text{cyclo}-(\text{P}^t\text{Bu}_3)_2\text{P}^t\text{Bu}-\kappa^2\text{P}^6,\text{P}^9\}]$ (**4**)

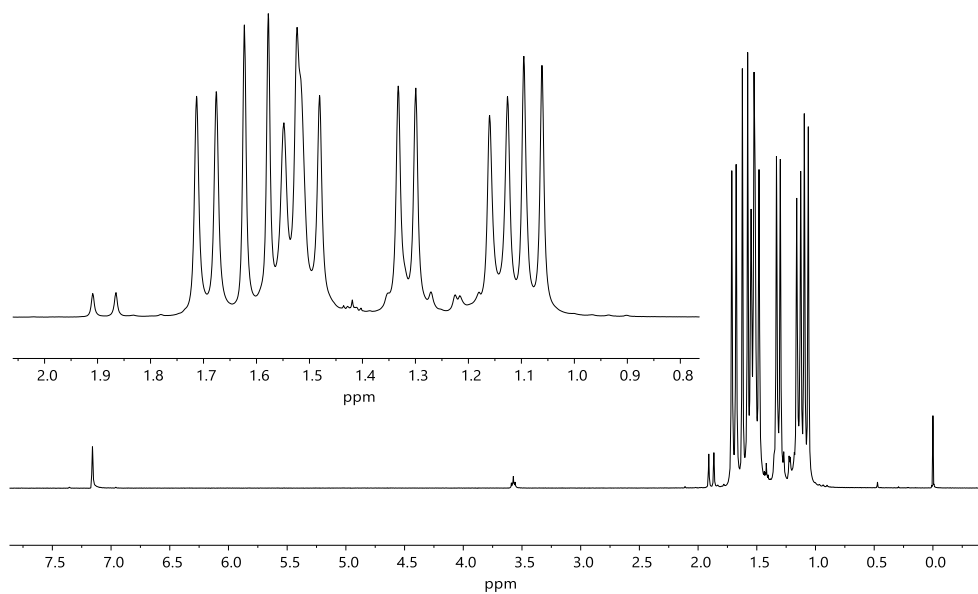

**Fig. S20**  $^1\text{H}$  NMR spectrum of **4** in benzene- $d^6$  (400 MHz).

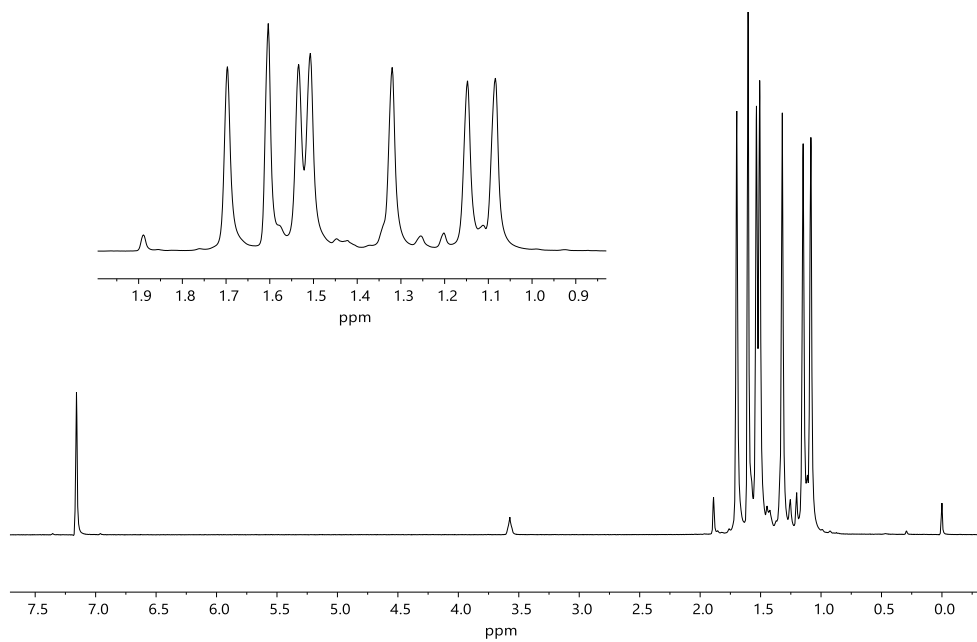

**Fig. S21**  $^1\text{H}\{^{31}\text{P}\}$  NMR spectrum of **4** in benzene- $d_6$  (400 MHz).

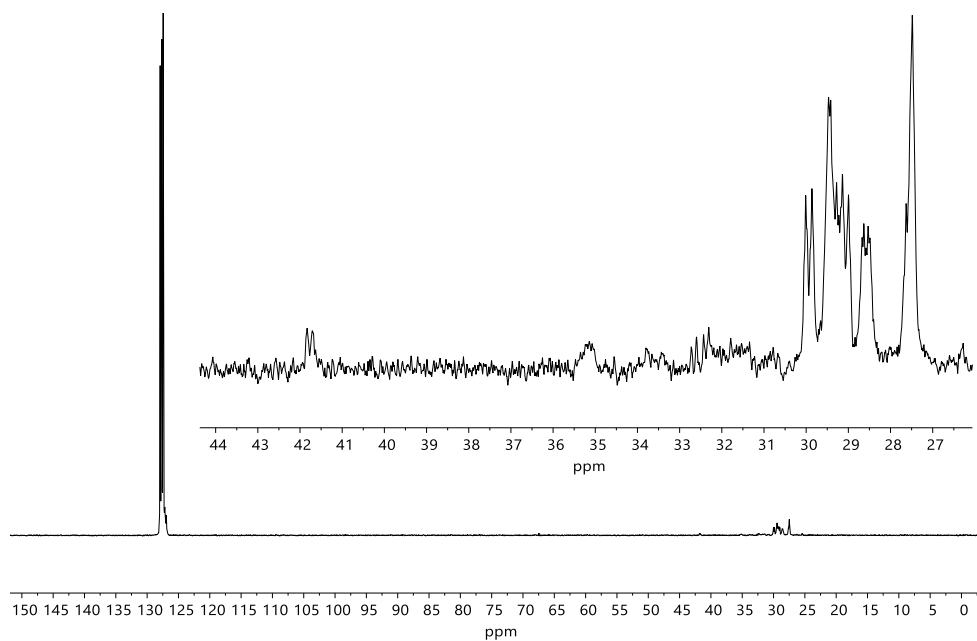

**Fig. S22**  $^{13}\text{C}\{^1\text{H}\}$  NMR spectrum of **4** in benzene- $d_6$  (101 MHz).



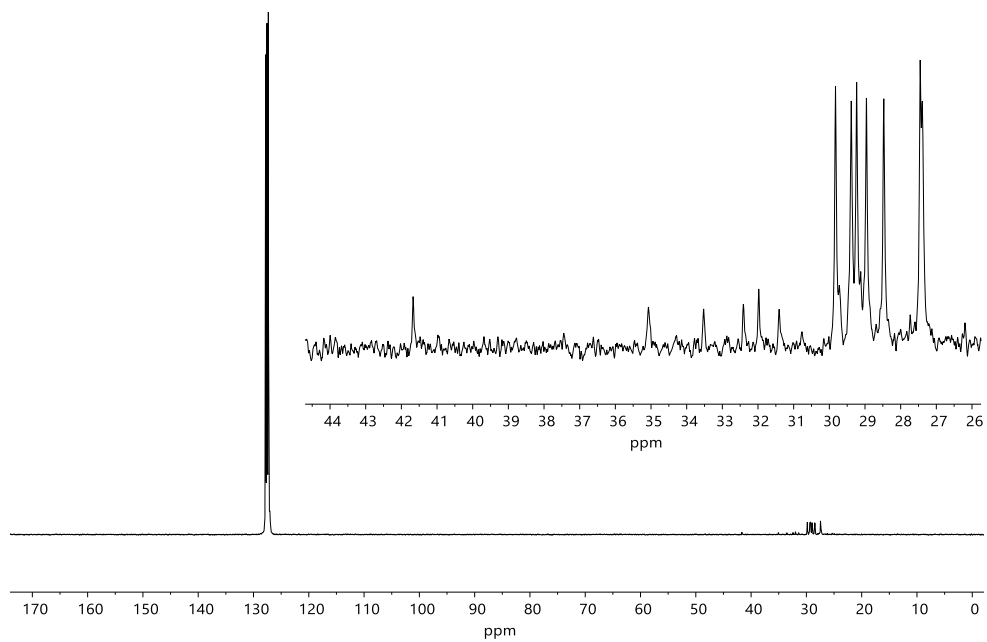

**Fig. S23**  $^{13}\text{C}\{^1\text{H},^{31}\text{P}\}$  NMR spectrum of **4** in benzene- $d^6$  (101 MHz).

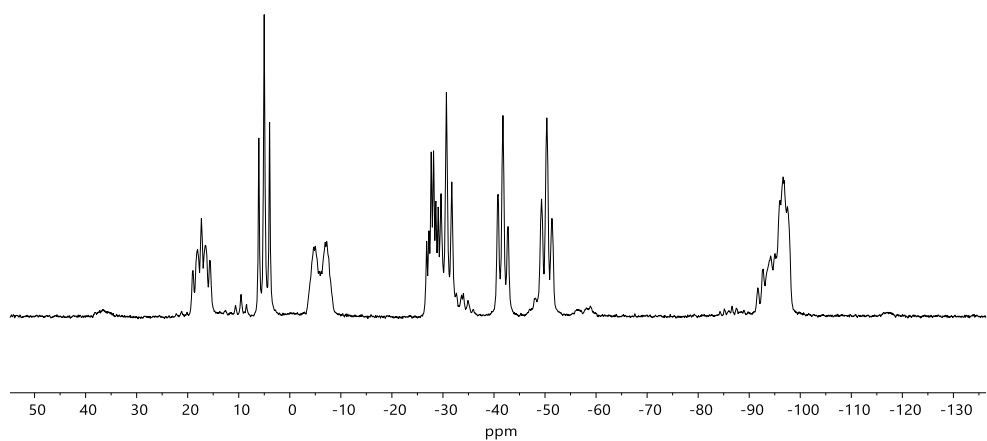

**Fig. S24**  $^{31}\text{P}\{^1\text{H}\}$  NMR spectrum of **4** in benzene- $d^6$  (162 MHz).
